# Supplementary material for: Effects of modified fly ash doped carbon paste electrodes and metal film electrodes on the determination of trace cadmium(ii) by anodic stripping voltammetry
Source: Royal Society of Chemistry journal article supplement (doi:10.1039/d0ra07493d), 2021-01-01
Supplement: d0ra07493d1.pdf [file d0ra07493d1.pdf]

## **Supporting Information**

### **Effects of modified fly ash doped carbon paste electrodes and metal film electrodes on the determination of trace cadmium (II) by anodic stripping voltammetry**

Jinying Hou, Yuping Fan, Xiaomin Ma, Xianshu Dong\*, Suling Yao

College of Mining Engineering, Taiyuan University of Technology, Taiyuan, 030024,  
People' Republic of China

\*Corresponding author. College of Mining Engineering, Taiyuan University of  
Technology, Taiyuan, 030024, China

E-mail address: [dxshu520@163.com](mailto:dxshu520@163.com)

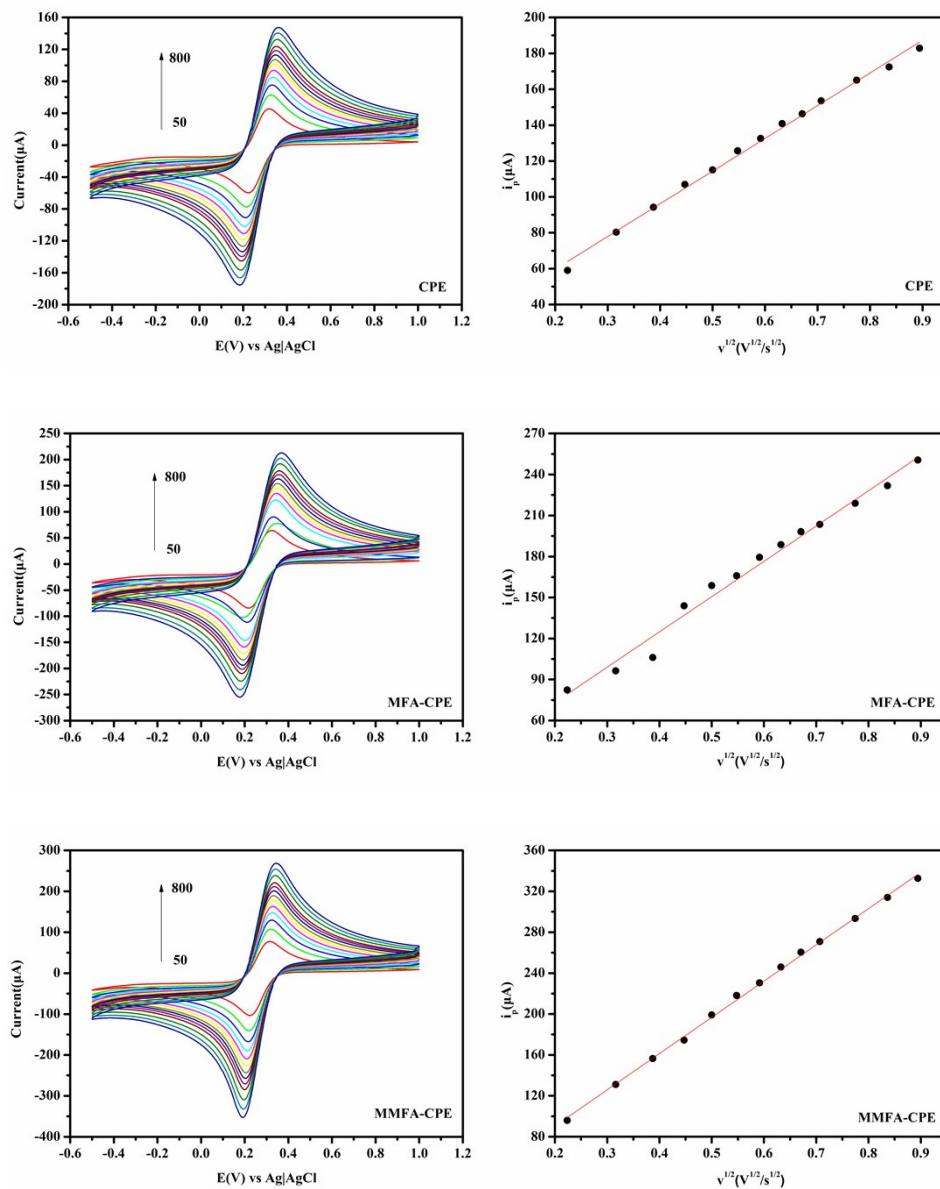

Fig.S1 CV profiles of CPE, MFA-CPE and MMFA-CPE in 5mM  $[\text{Fe}(\text{CN})_6]^{3-/4-}$  containing 1M KCl with different scan rates (50, 100, 150, 200, 250, 300, 350, 400, 450, 500, 600, 700 and 800 mV/s) and plots of  $i_p$  vs.  $v^{1/2}$ .

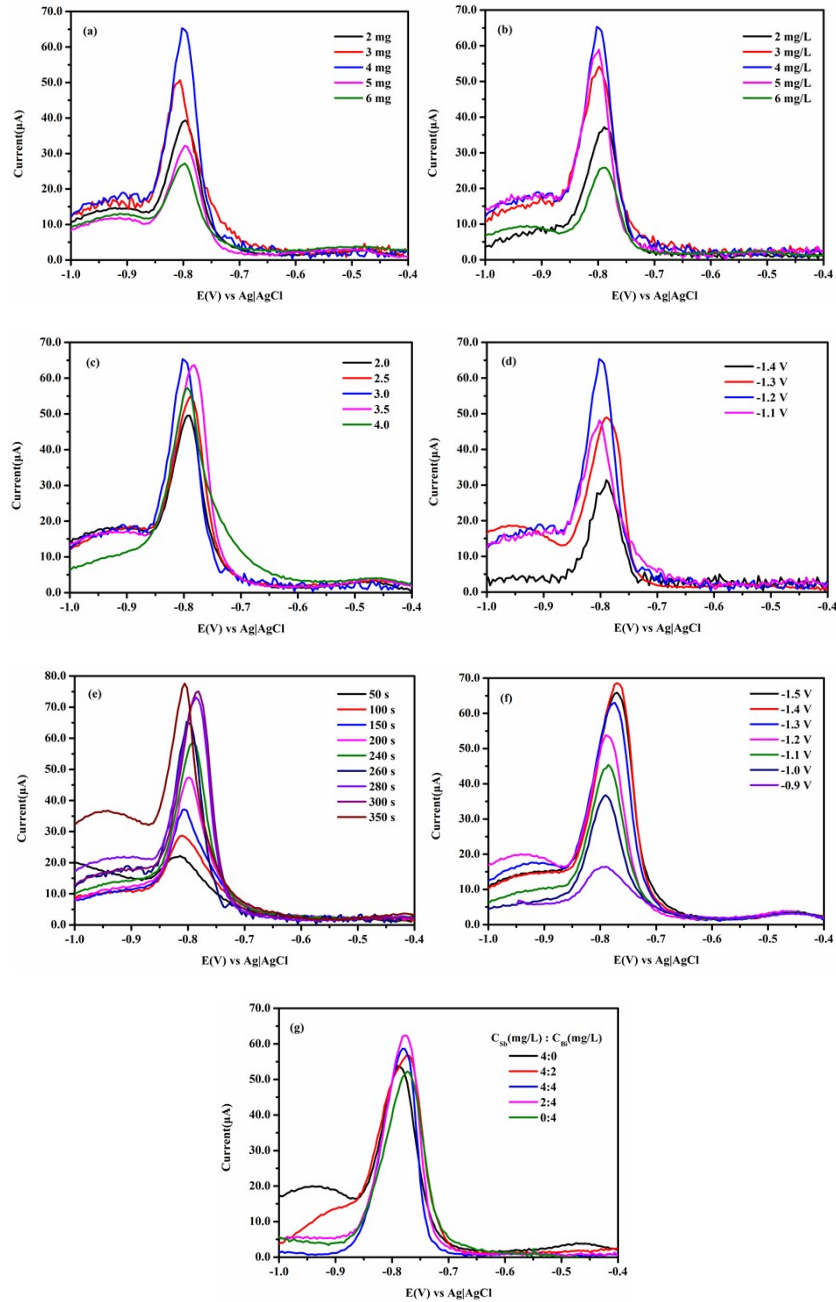

Fig.S2 Effect of different (a) amounts of MFA, (b) amounts of Sb(III), (c) pH, (d) deposition potential and (e) deposition time on the SWASV response of 80.0  $\mu\text{g/L}$  Cd(II) at Sb/MFA-CPE. Effect of different (f) deposition potential on the SWASV response of 80.0  $\mu\text{g/L}$  Cd(II) at Sb/MMFA-CPE. Effect of different (g) amounts of Sb(III) and Bi(III) on the SWASV response of 80.0  $\mu\text{g/L}$  Cd(II) at Sb-Bi/MMFA-CPE.

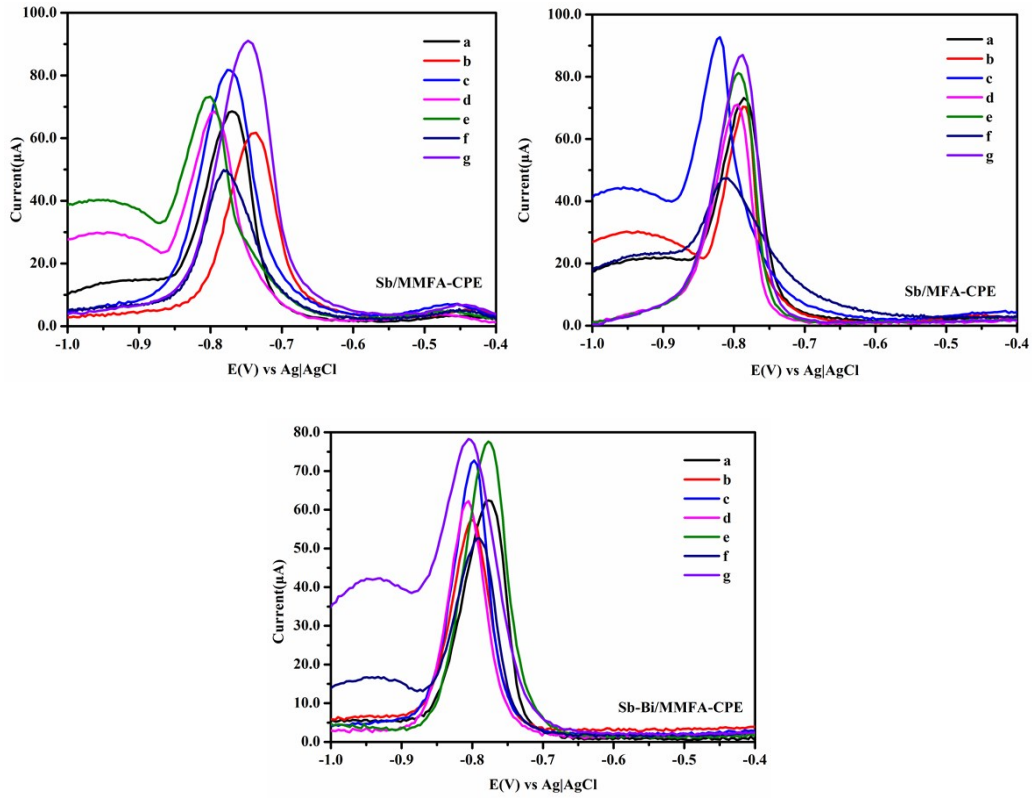

Fig.S3 SWASV responses of 80  $\mu\text{g/L}$  Cd(II) at Sb/MFA-CPE, Sb/MMFA-CPE and Sb-Bi/MMFA-CPE with pulse amplitude, the frequency and scan rate of (a) 50, 25 and 100, (b) 40, 25 and 100, (c) 60, 25 and 100, (d) 50, 20 and 100, (e) 50, 30 and 100, (f) 50, 25 and 50, (g) 50mV, 25Hz and 150mV/s, respectively.

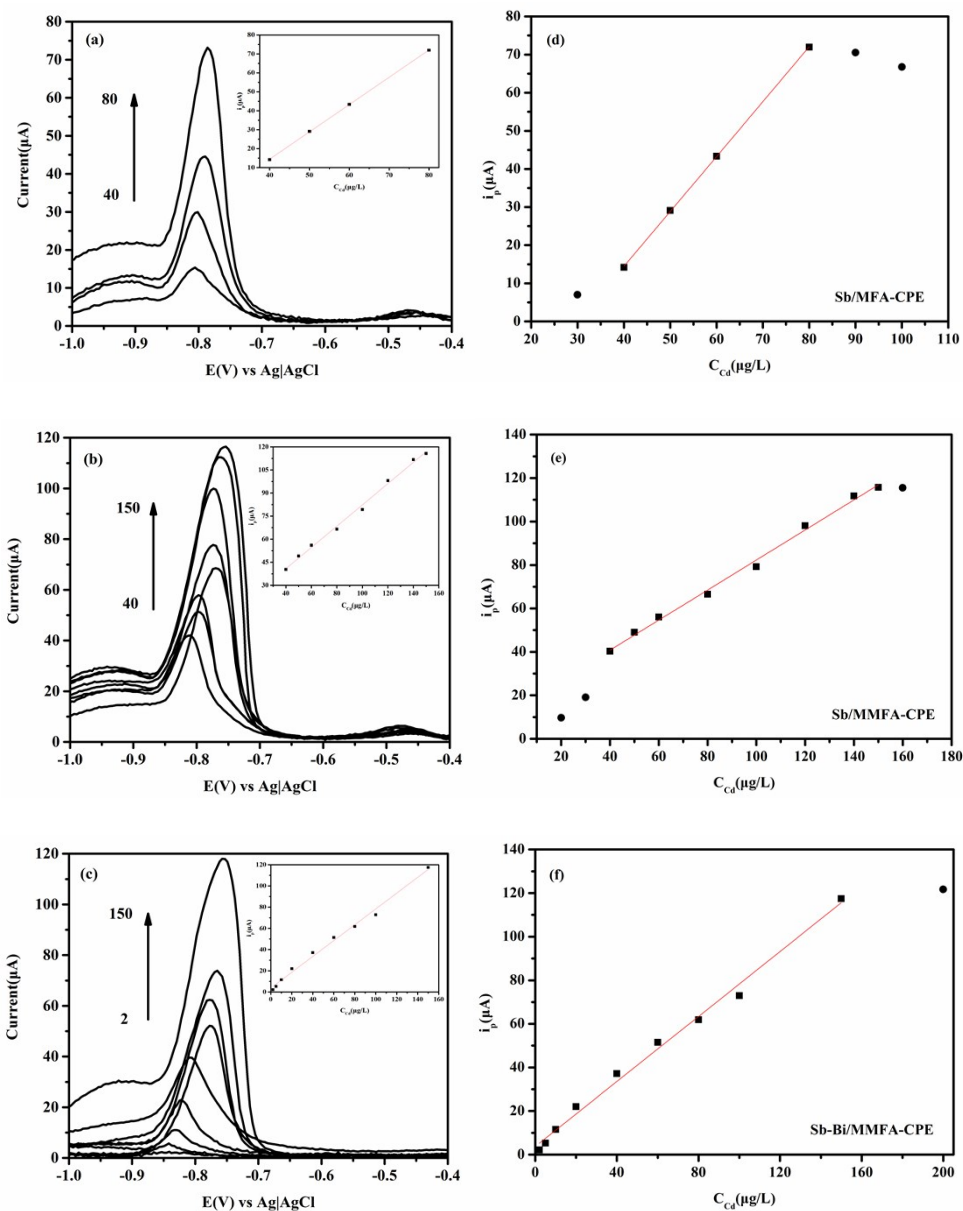

Fig.S4 SWASV responses of Cd(II) of different concentrations at (a) Sb/MFA-CPE, (b) Sb/MMFA-CPE and (c) Sb-Bi/MMFA-CPE. The inset (a, b and c) and (d, e and f) show the calibration curves for the determination of Cd(II) of different concentrations.

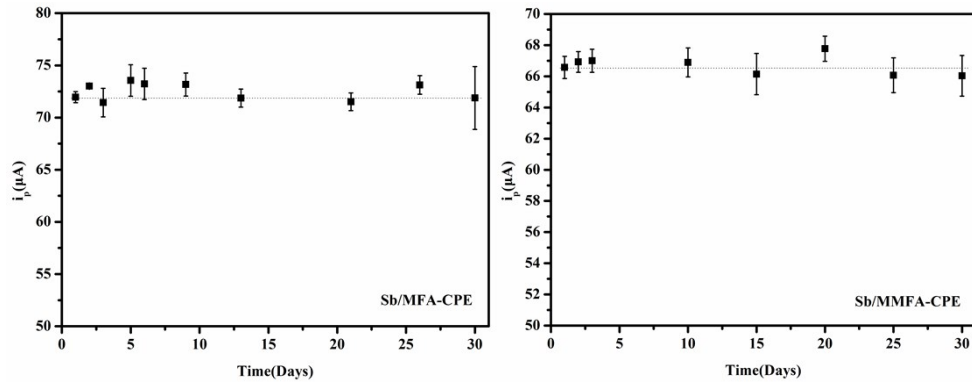

Fig.S5 Long-term stability of MFA-CPE and MMFA-CPE.

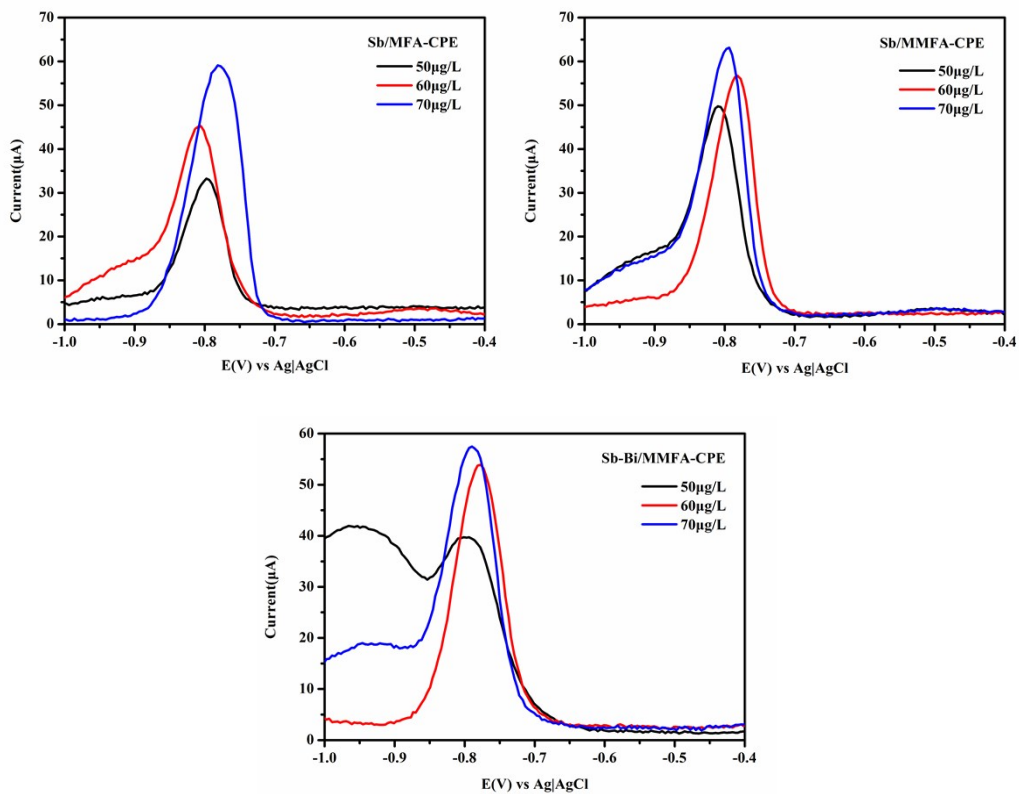

Fig.S6 SWASV responses of 50, 60 and 70 µg/L Cd( II ) at Sb/MFA-CPE, Sb/MMFA-CPE and Sb-Bi/MMFA-CPE in the sample with 0.1 mL tap water.

Table S1 Electrochemical data of CPE, MFA-CPE and MMFA-CPE in 5mM  $[\text{Fe}(\text{CN})_6]^{3-/4-}$  containing 1M KCl at a scan rate of 150mV/s.

| Electrodes | $\Delta E_p$ (mV) | $I_{pa}$ ( $\mu\text{A}$ ) | *A ( $\text{cm}^2$ ) |
|------------|-------------------|----------------------------|----------------------|
| CPE        | 122.38            | 94.21                      | 0.049                |
| MFA-CPE    | 121.46            | 106.07                     | 0.070                |
| MMFA-CPE   | 108.59            | 156.47                     | 0.096                |

\*A, active surface area.



Table S2 Robustness results of the proposed method of three electrodes.

| Electrodes     | Variables                      |         | Recovery (%) | RSD (%) | Conditions                  |
|----------------|--------------------------------|---------|--------------|---------|-----------------------------|
| Sb/MFA-CPE     | Deposition potential ( $E_d$ ) | -1.19 V | 101.85       | 0.42    | $E_a=50$ mV<br>pH=3         |
|                |                                | -1.21 V | 100.26       | 0.94    |                             |
|                | Pulse amplitude ( $E_a$ )      | 48 mV   | 100.30       | 1.41    | $E_d=-1.2$ V<br>pH=3        |
|                |                                | 52 mV   | 100.30       | 3.29    |                             |
|                | pH                             | 2.92    | 101.39       | 0.97    | $E_d=-1.2$ V<br>$E_a=50$ mV |
| 3.07           |                                | 100.31  | 1.43         |         |                             |
| Sb/MMFA-CPE    | Deposition potential ( $E_d$ ) | -1.39 V | 99.78        | 1.87    | $E_a=50$ mV<br>pH=3         |
|                |                                | -1.41 V | 99.90        | 0.83    |                             |
|                | Pulse amplitude ( $E_a$ )      | 48 mV   | 100.46       | 0.93    | $E_d=-1.4$ V<br>pH=3        |
|                |                                | 52 mV   | 100.07       | 0.83    |                             |
|                | pH                             | 2.9     | 99.54        | 1.13    | $E_d=-1.4$ V<br>$E_a=50$ mV |
| 3.06           |                                | 101.81  | 1.16         |         |                             |
| Sb-Bi/MMFA-CPE | Deposition potential ( $E_d$ ) | -1.19 V | 101.26       | 1.60    | $E_a=50$ mV<br>pH=3         |
|                |                                | -1.21 V | 100.47       | 1.16    |                             |
|                | Pulse amplitude ( $E_a$ )      | 48 mV   | 100.76       | 2.14    | $E_d=-1.2$ V<br>pH=3        |
|                |                                | 52 mV   | 100.30       | 0.75    |                             |
|                | pH                             | 2.94    | 101.87       | 0.61    | $E_d=-1.2$ V<br>$E_a=50$ mV |
| 3.02           |                                | 99.78   | 0.98         |         |                             |

Table S3 Some analytical methods for the determination of toxic metals.

| Electrode substrate          | Modified material              | Film electrode | Method | Linearity range ( $\mu\text{g/L}$ )                                         | Detection limit ( $\mu\text{g/L}$ )                            | Ref.      |
|------------------------------|--------------------------------|----------------|--------|-----------------------------------------------------------------------------|----------------------------------------------------------------|-----------|
| Carbon paste electrode       | FA modified with NaOH          | Sb             | ASV    | 40-80(Cd)                                                                   | 2.63                                                           | This work |
|                              | FA modified with NaOH and CTAB | Sb             | ASV    | 40-150(Cd)                                                                  | 2.25                                                           |           |
|                              |                                | Sb-Bi          | ASV    | 2-150(Cd)                                                                   | 1.36                                                           |           |
| Carbon paste electrode       | Sodium montmorillonite         | Sb             | ASV    | 4-150 (Cd)                                                                  | 0.25                                                           | [1]       |
| Carbon paste electrode       | Montmorillonite                | Bi             | ASV    | 1-24 (Pb, Cd)                                                               | 0.2(Pb)<br>0.35(Cd)                                            | [2]       |
| Carbon paste electrode       | Multi-walled carbon nanotubes  | Sb             | ASV    | 10-60 (Pb, Cd)                                                              | 0.65(Pb)<br>0.77(Cd)                                           | [3]       |
| Carbon paste electrode       | Zeolite                        | Bi             | ASV    | 1-20 (Pb, Cd)                                                               | 0.1(Pb)<br>0.08(Cd)                                            | [4]       |
| Conductive polymer electrode | /                              | Sb             | ASV    | 0-120 (Pb, Cd)                                                              | 0.95(Pb)<br>1.3(Cd)                                            | [5]       |
| Screen-printed electrode     | /                              | Te             | ASV    | 2-35(Cu)                                                                    | 0.5                                                            | [6]       |
| Glassy carbon electrode      | /                              | Sb             | ASV    | 2-100(Cd)<br>5-100(Pb)<br>2-100(Tl)<br>20-200(Zn)<br>10-100(In)<br>0-50(Cu) | 0.7(Cd)<br>1.5(Pb)<br>1.0(Tl)<br>3.8(Zn)<br>1.4(In)<br>0.5(Cu) | [7]       |

Table S4 Reproducibility of three electrodes tested with 80.0  $\mu\text{g/L}$  Cd(II).

| Electrodes     | $i_p$ ( $\mu\text{A}$ ) |       |        | Average<br>( $\mu\text{A}$ ) | RSD<br>(%) |
|----------------|-------------------------|-------|--------|------------------------------|------------|
|                | Day 1                   | Day 2 | Day 3  |                              |            |
| Sb/MFA-CPE     | 71.96                   | 73.02 | 71.44  | 72.14                        | 1.12       |
| Sb/MMFA-CPE    | 66.57                   | 66.93 | 67.01  | 66.84                        | 0.35       |
| Sb-Bi/MMFA-CPE | 61.89                   | 62.78 | 62.496 | 62.39                        | 0.73       |

## References

- 1 G. Chen, X. Hao, B. L. Li, H. Q. Luo and N. B. Li, *Sensors and Actuators B: Chemical*, 2016, 237, 570–574.
- 2 L. Q. Luo, X. Wang, Y. P. Ding, Q. X. Li, J. B. Jia, D. M. Deng, *Applied Clay Science*, 2010, 50, 154-157.
- 3 A. M. Ashrafi, S. Cerovac, S. Mudric, V. Guzsvany, L. Husakova, I. Urbanova, et al., *Sensors and Actuators B: Chemical*, 2014, 191, 320–325.
- 4 L. Y. Cao, J. B. Jia, Z. H. Wang, *Electrochimica Acta*, 2008, 53, 2177-2182.
- 5 S. Christidi, A. Chrysostomou, A. Economou, C. Kokkinos, P. R. Fielden, S. J. Baldock, N. J. Goddard, *Sensors*, 2019, 19, 4809.
- 6 A. Bobrowski, A. Królicka, J. Śliwa, J. Zarębski, A. Economou, K. Kalcher, *Electroanalysis*, 2018, 30, 2004-2010.
- 7 A. Bobrowski, M. Putek, J. Zarębski, *Electroanalysis*, 2012, 24, 1071-1078.
